# Supplementary material for: Terminal Reassortment Drives the Quantum Evolution of Type III Effectors in Bacterial Pathogens
Source: PLOS journal article supplement (doi:10.1371/journal.ppat.0020104), 2006-10-10
Supplement: S1 (10.1371/journal.ppat.0020104.s001) [file journal.ppat.0020104.s001]

**Supplementary Table 1 – Type III effector proteins from 21 different genera**

| **Species** | **Effector** | **Accession** | **Species** | **Effector** | **Accession** |
| --- | --- | --- | --- | --- | --- |
| *Aeromonas* | AopB | AAV30235 | *Ralstonia* | PopA | [BAC55932](http://www.ncbi.nlm.nih.gov/entrez/viewer.fcgi?val=BAC55932.1) |
|  | AexT | AAK83052 |  | PopB | [BAC55933](http://www.ncbi.nlm.nih.gov/entrez/viewer.fcgi?val=BAC55933.1) |
| *Bartonella* | YopP | [CAF26618](http://www.ncbi.nlm.nih.gov/entrez/viewer.fcgi?db=protein&val=49240159) |  | PopC | [BAC55934](http://www.ncbi.nlm.nih.gov/entrez/viewer.fcgi?val=BAC55934.1) |
| *Bordetella* | BopN | NP_884470 |  | RipA | [NP_522585](http://www.ncbi.nlm.nih.gov/entrez/viewer.fcgi?val=NP_522585.1) |
|  | BopB | NP_888166 |  | RipB | [NP_518366](http://www.ncbi.nlm.nih.gov/entrez/viewer.fcgi?val=NP_518366.1) |
|  | BopD | NP_884474 |  | RipG | [NP_519922](http://www.ncbi.nlm.nih.gov/entrez/viewer.fcgi?val=NP_519922.1) |
|  | Bsp22 | NP_884471 |  | RipT | NP_521333 |
|  | BB4227 | NP_890762 |  | PopP1 | CAF32330 |
| *Bradyrhizobium* | NopB | Top of Form  BAC47077 |  | PopP2 | NP_518989 |
|  | NopN | Top of Form  NP_770599 | *Rhizobium* | NopB | Top of Form  AAB91944 |
|  | NopP | AAG60738 |  | NopC | YP_052972 |
| *Burkholderia* | BopE | YP_106114 |  | NopL | Top of Form  [AAB91935](http://www.ncbi.nlm.nih.gov/entrez/query.fcgi?cmd=Retrieve&db=Protein&list_uids=2182720&dopt=GenPept) |
| *Citrobacter* | NleA | [AAR84051](http://www.ncbi.nlm.nih.gov/entrez/viewer.fcgi?db=protein&val=40287882) |  | NopN | Top of Form  CAA68627 |
|  | NleB | [AAU95470](http://www.ncbi.nlm.nih.gov/entrez/viewer.fcgi?db=protein&val=53850832) |  | NopP | Top of Form  [AAB91955](http://www.ncbi.nlm.nih.gov/entrez/query.fcgi?cmd=Retrieve&db=Protein&list_uids=2182742&dopt=GenPept) |
|  | NleC | [AAS47019](http://www.ncbi.nlm.nih.gov/entrez/viewer.fcgi?db=protein&val=44307598) |  | NopX | Top of Form  AAB91942 |
|  | NleD | [AAS47020](http://www.ncbi.nlm.nih.gov/entrez/viewer.fcgi?db=protein&val=44307600) | *Salmonella* | PipB | NP_460061 |
|  | NleE | [AAU95471](http://www.ncbi.nlm.nih.gov/entrez/viewer.fcgi?db=protein&val=53850834) |  | PipB2 | NP_461706 |
|  | NleF | [AAS48168](http://www.ncbi.nlm.nih.gov/entrez/viewer.fcgi?db=protein&val=44888792) |  | AvrA | [AAB83970](http://www.ncbi.nlm.nih.gov/entrez/viewer.fcgi?val=AAB83970.1) |
|  | NleH | [AAS48169](http://www.ncbi.nlm.nih.gov/entrez/viewer.fcgi?db=protein&val=44888794) |  | SopA | NP_461011 |
| *Chlamydia* | IncA | O69196 |  | SopB/SigD | [NP_460064](http://www.ncbi.nlm.nih.gov/entrez/viewer.fcgi?val=NP_460064.1) |
|  | IncB | YP_328040 |  | SopD | [NP_461866](http://www.ncbi.nlm.nih.gov/entrez/viewer.fcgi?val=NP_461866.1) |
|  | IncC | YP_328041 |  | SopD2 | [NC_003198](http://www.ncbi.nlm.nih.gov/entrez/viewer.fcgi?val=NC_003198) |
|  | CopN/SctW | NP_296742 |  | SopE | AF043239 |
|  | CT456 | [AAT47185](http://www.ncbi.nlm.nih.gov/entrez/viewer.fcgi?val=AAT47185.1) |  | SopE2 | [NP_460811](http://www.ncbi.nlm.nih.gov/entrez/viewer.fcgi?val=NP_460811.1) |
|  | Cpn0809 | [AAD18947](http://www.ncbi.nlm.nih.gov/entrez/viewer.fcgi?val=AAD18947.1) |  | SifA | NP_460194 |
|  | Cpn1020 | [AAD19157](http://www.ncbi.nlm.nih.gov/entrez/viewer.fcgi?db=protein&val=4377351) |  | SifB | [NP_460561](http://www.ncbi.nlm.nih.gov/entrez/viewer.fcgi?val=NP_460561.1) |
| *Erwinia* | DspE | AAF76343 |  | SsaB/SpiC | [NP_460358](http://www.ncbi.nlm.nih.gov/entrez/viewer.fcgi?val=NP_460358.1) |
| *Escherichia* | Map(orf19) | [BAB37985](http://www.ncbi.nlm.nih.gov/entrez/viewer.fcgi?val=BAB37985.1) |  | SseB | [CAA12185](http://www.ncbi.nlm.nih.gov/entrez/viewer.fcgi?val=CAA12185.1) |
|  | Tir/EspE | [AAL57549](http://www.ncbi.nlm.nih.gov/entrez/viewer.fcgi?val=AAL57549.1) |  | SseC | [CAA12187](http://www.ncbi.nlm.nih.gov/entrez/viewer.fcgi?val=CAA12187.1) |
|  | EspA | AAL57554 |  | SseD | [CAA12188](http://www.ncbi.nlm.nih.gov/entrez/viewer.fcgi?val=CAA12188.1) |
|  | EspB | [AAL57556](http://www.ncbi.nlm.nih.gov/entrez/viewer.fcgi?val=AAL57556.1) |  | SseE | [NP_460367](http://www.ncbi.nlm.nih.gov/entrez/viewer.fcgi?val=NP_460367.1) |
|  | EspD | [AAL57555](http://www.ncbi.nlm.nih.gov/entrez/viewer.fcgi?val=AAL57555.1) |  | SseF | [NP_460369](http://www.ncbi.nlm.nih.gov/entrez/viewer.fcgi?val=NP_460369.1) |
|  | EspF | [AAL57560](http://www.ncbi.nlm.nih.gov/entrez/viewer.fcgi?val=AAL57560.1) |  | SseG | [NP_460370](http://www.ncbi.nlm.nih.gov/entrez/viewer.fcgi?val=NP_460370.1) |
|  | EspFu | [NP_310742](http://www.ncbi.nlm.nih.gov/entrez/viewer.fcgi?db=protein&val=15831969) |  | SseI | [NP_460026](http://www.ncbi.nlm.nih.gov/entrez/viewer.fcgi?val=NP_460026.1) |
|  | EspG | [AAL57522](http://www.ncbi.nlm.nih.gov/entrez/viewer.fcgi?val=AAL57522.1) |  | SseJ | [NP_460590](http://www.ncbi.nlm.nih.gov/entrez/viewer.fcgi?val=NP_460590.1) |
|  | EspH | [BAB37987](http://www.ncbi.nlm.nih.gov/entrez/viewer.fcgi?val=BAB37987.1) |  | SseK1 | [NP_461081](http://www.ncbi.nlm.nih.gov/entrez/viewer.fcgi?val=NP_461081.1) |
|  | NleA/EspI | AAR84051 |  | SseK2 | [NP_463026](http://www.ncbi.nlm.nih.gov/entrez/viewer.fcgi?val=NP_463026.1) |
|  | EspJ | [NP_288436](http://www.ncbi.nlm.nih.gov/entrez/viewer.fcgi?db=protein&val=15802410) |  | SlrP | [NP_459778](http://www.ncbi.nlm.nih.gov/entrez/viewer.fcgi?val=NP_459778.1) |
|  | Cif | [AAQ07241](http://www.ncbi.nlm.nih.gov/entrez/viewer.fcgi?val=AAQ07241.1) |  | SrfH | [AAF73990](http://www.ncbi.nlm.nih.gov/entrez/viewer.fcgi?val=AAF73990.2) |
|  | SepZ | CAI43877 |  | SptP | AAC44349 |
| *Mesorhizobium* | NopB | Top of Form  NP_106862 |  | SipA | [NP_461803](http://www.ncbi.nlm.nih.gov/entrez/viewer.fcgi?val=NP_461803.1) |
|  | NopX | Top of Form  [NP_106860](http://www.ncbi.nlm.nih.gov/entrez/query.fcgi?cmd=Retrieve&db=Protein&list_uids=13475296&dopt=GenPept) |  | SspH1 | [AAD40326](http://www.ncbi.nlm.nih.gov/entrez/viewer.fcgi?db=protein&val=5123457) |
| *Pantoea* | PthG | AAC24862 |  | SspH2 | [AAF00615](http://www.ncbi.nlm.nih.gov/entrez/viewer.fcgi?val=AAF00615.1) |
|  | WtsE | AAG01467 | *Shigella* | IpaA | NP_858258 |
|  | HsvG | [AAC24711](http://www.ncbi.nlm.nih.gov/entrez/viewer.fcgi?val=AAC24711.1) |  | IpaB | [AAP78991](http://www.ncbi.nlm.nih.gov/entrez/viewer.fcgi?db=protein&val=32307021) |
|  | AvrPphD | [AAL68651](http://www.ncbi.nlm.nih.gov/entrez/viewer.fcgi?val=AAL68651.1) |  | IpaC | [AAP78990](http://www.ncbi.nlm.nih.gov/entrez/viewer.fcgi?val=AAP78990.1) |
| *Photorhabdus* | LopT | AAO18078 |  | IpaD | [AAP78989](http://www.ncbi.nlm.nih.gov/entrez/viewer.fcgi?val=AAP78989.1) |
| *P. aeruginosa* | ExoS | NP_252530 |  | VirA | [AAP79023](http://www.ncbi.nlm.nih.gov/entrez/viewer.fcgi?val=AAP79023.1) |
|  | ExoT | NP_248734 |  | IpgF | [AAA26519](http://www.ncbi.nlm.nih.gov/entrez/viewer.fcgi?val=AAA26519.1) |
|  | ExoU | AAC16023 |  | IpgD | [AAA26517](http://www.ncbi.nlm.nih.gov/entrez/viewer.fcgi?val=AAA26517.1) |
|  | ExoY | NP_250881 |  | Ipgb1 | [AAP78993](http://www.ncbi.nlm.nih.gov/entrez/viewer.fcgi?val=AAP78993.1) |
| *P. fluorescens* | AvrA | Sanger |  | OspC3 | [AAP78984](http://www.ncbi.nlm.nih.gov/entrez/viewer.fcgi?val=AAP78984.1) |
|  | ExoY | Sanger |  | OspC2 | [CAC05785](http://www.ncbi.nlm.nih.gov/entrez/viewer.fcgi?val=CAC05785.1) |
| *P. syringae* | AvrA1 | M15194 |  | OspC1 | [CAC05790](http://www.ncbi.nlm.nih.gov/entrez/viewer.fcgi?val=CAC05790.1) |
|  | AvrB1 | M21965 |  | OspB | [AAP78967](http://www.ncbi.nlm.nih.gov/entrez/viewer.fcgi?val=AAP78967.1) |
|  | AvrE1 | AF232004 |  | OspE1 | AL391753 |
|  | AvrPto1 | AAO57459 |  | OspD1 | [CAC05775](http://www.ncbi.nlm.nih.gov/entrez/viewer.fcgi?val=CAC05775.1) |
|  | AvrRpm1 | X67808 |  | OspD2 | [CAC05772](http://www.ncbi.nlm.nih.gov/entrez/viewer.fcgi?val=CAC05772.1) |
|  | AvrRps4 | L43559 |  | OspD3 | [CAC05789](http://www.ncbi.nlm.nih.gov/entrez/viewer.fcgi?val=CAC05789.1) |
|  | AvrRpt2 | L11355 |  | OspF | [CAC05773](http://www.ncbi.nlm.nih.gov/entrez/viewer.fcgi?val=CAC05773.1) |
|  | HopA1 | AAO58779 |  | OspG | [CAC05855](http://www.ncbi.nlm.nih.gov/entrez/viewer.fcgi?val=CAC05855.1) |
|  | HopB1 | AF232004 |  | IcsB | [AAP78995](http://www.ncbi.nlm.nih.gov/entrez/viewer.fcgi?val=AAP78995.1) |
|  | HopC1 | AAO54131 |  | NleA/EspI | [AAR84051](http://www.ncbi.nlm.nih.gov/entrez/viewer.fcgi?db=protein&val=40287882) |
|  | HopD1 | AAO54410 |  | NleB | [AAU95470](http://www.ncbi.nlm.nih.gov/entrez/viewer.fcgi?db=protein&val=53850832) |
|  | HopE1 | AY208297 |  | NleC | [AAS47019](http://www.ncbi.nlm.nih.gov/entrez/viewer.fcgi?db=protein&val=44307598) |
|  | HopF1 | AAO54046 |  | NleD | [AAS47020](http://www.ncbi.nlm.nih.gov/entrez/viewer.fcgi?db=protein&val=44307600) |
|  | HopG1 | AY208296 |  | NleE | [AAU95471](http://www.ncbi.nlm.nih.gov/entrez/viewer.fcgi?db=protein&val=53850834) |
|  | HopH1 | AAO54130 |  | NleF | [AAS48168](http://www.ncbi.nlm.nih.gov/entrez/viewer.fcgi?db=protein&val=44888792) |
|  | HopI1 | AAO58206 |  | NleH | [AAS48169](http://www.ncbi.nlm.nih.gov/entrez/viewer.fcgi?db=protein&val=44888794) |
|  | HopJ1 | AAO54706 | *Sinorhizobium* | NopB | [AAL98691](http://www.ncbi.nlm.nih.gov/entrez/viewer.fcgi?db=protein&val=19749321) |
|  | HopK1 | AAO53599 |  | NopC | AAY33494 |
|  | HopL1 | AAO56368 |  | NopL | [NP_444148](http://www.ncbi.nlm.nih.gov/entrez/viewer.fcgi?db=protein&val=16520028) |
|  | HopM1 | AAO54897 |  | NopN | [CAA41490](http://www.ncbi.nlm.nih.gov/entrez/viewer.fcgi?db=protein&val=581520) |
|  | HopN1 | AAO54892 |  | NopP | Top of Form  AAY33495 |
|  | HopO1 | AF458392 |  | NopX | [AAU85363](http://www.ncbi.nlm.nih.gov/entrez/viewer.fcgi?db=protein&val=52631913) |
|  | HopP1 | AAO56180 | *Vibrio* | VopA/VopJ | AAT08443 |
|  | HopQ1 | AF458396 |  | VopN | AAS13317 |
|  | HopR1 | AF458397 | *Xanthomonas* | AvrBstX | [AAD39255](http://www.ncbi.nlm.nih.gov/entrez/viewer.fcgi?val=AAD39255.1) |
|  | HopS1 | AF458404 |  | AvrB6 | [AAB00675](http://www.ncbi.nlm.nih.gov/entrez/viewer.fcgi?val=AAB00675.1) |
|  | HopT1 | AF458399 |  | AvrBs1 | [AAA27594](http://www.ncbi.nlm.nih.gov/entrez/viewer.fcgi?val=AAA27594.1) |
|  | HopU1 | AAO54045 |  | AvrBs2 | [AAD11434](http://www.ncbi.nlm.nih.gov/entrez/viewer.fcgi?val=AAD11434.1) |
|  | HopV1 | AAO58158 |  | XopA | AAL78294 |
|  | HopW1 | AF458040 |  | XopD | [AAL78292](http://www.ncbi.nlm.nih.gov/entrez/viewer.fcgi?val=AAL78292.1) |
|  | HopX1 | AAO59038 |  | XopB | [AAK72487](http://www.ncbi.nlm.nih.gov/entrez/viewer.fcgi?val=AAK72487.1) |
|  | HopY1 | AF458403 |  | AvrRxv | [AAA27595](http://www.ncbi.nlm.nih.gov/entrez/viewer.fcgi?val=AAA27595.1) |
|  | HopZ1 | AF458043 |  | XopC | [AAR23832](http://www.ncbi.nlm.nih.gov/entrez/viewer.fcgi?val=AAR23832.1) |
|  | HopAA1 | AAO54894 |  | XopJ | [AAK72486](http://www.ncbi.nlm.nih.gov/entrez/viewer.fcgi?val=AAK72486.1) |
|  | HopAB1 | AY074795 |  | AvrXccE1 | [AAM40923](http://www.ncbi.nlm.nih.gov/entrez/viewer.fcgi?val=AAM40923.1) |
|  | HopAC1 | AF545478 |  | AvrXacE2 | [NP_643532](http://www.ncbi.nlm.nih.gov/entrez/viewer.fcgi?db=protein&val=21243950) |
|  | HopAD1 | AF458398 |  | AvrXccB | [AAM42989](http://www.ncbi.nlm.nih.gov/entrez/viewer.fcgi?val=AAM42989.1) |
|  | HopAE1 | DAA00391 |  | AvrXccC | [AAM41397](http://www.ncbi.nlm.nih.gov/entrez/viewer.fcgi?val=AAM41397.1) |
|  | HopAF1 | AAO55088 |  | PsvA | [AAM42168](http://www.ncbi.nlm.nih.gov/entrez/viewer.fcgi?db=protein&val=21114097) |
|  | HopAG1 | DAA00387 |  | XopF1 | [DAA05627](http://www.ncbi.nlm.nih.gov/entrez/viewer.fcgi?db=protein&val=55981944) |
|  | HopAH1 | AAO54439 |  | XopF2 | [AAV74205](http://www.ncbi.nlm.nih.gov/entrez/viewer.fcgi?db=protein&val=56121735) |
|  | HopAI1 | AAO54440 |  | XopN | [AAV74202](http://www.ncbi.nlm.nih.gov/entrez/viewer.fcgi?db=protein&val=56121732) |
|  | HopAJ1 | AAO54387 |  | XopO | [AAV74207](http://www.ncbi.nlm.nih.gov/entrez/viewer.fcgi?db=protein&val=56121739) |
|  | HopAK1 | AAO57557 |  | XopP | [AAV74208](http://www.ncbi.nlm.nih.gov/entrez/viewer.fcgi?db=protein&val=56121741) |
|  | HopAL1 | AF458049 |  | XopQ | [AAV74206](http://www.ncbi.nlm.nih.gov/entrez/viewer.fcgi?db=protein&val=56121737) |
|  | HopAM1 | AAO54553 |  | XopX | AAT39020 |
|  | HopAN1 | AAO58488 | *Yersinia* | YopE | NP_995401 |
|  | HopAO1 | AAO58160 |  | YopH | NP_995345 |
|  | HopAP1 | AAY36934 |  | YpkA | NP_995341 |
|  | HopAQ1 | AF458394 |  | YopM | NP_995386 |
|  | HopAR1 | M86401 |  | YopJ | NP_995342 |
|  | HopAS1 | AAZ37064 |  | YopT | NP_395155 |
|  | HopAT1 | AY803994 |  |  |  |
|  | HopAU1 | AY803995 |  |  |  |
|  | HopAV1 | AY803996 |  |  |  |
|  | HopAW1 | AY803997 |  |  |  |
